# Supplementary material
Source: ML conference proceedings conference paper supplement (https://proceedings.neurips.cc/paper_files/paper/2023/hash/0ffd11b5bce666816802b86c77b54cf7-Abstract.html)
Supplement: Supplementary file 1 [file 0ffd11b5bce666816802b86c77b54cf7-Supplemental-Conference.pdf]

528 *Proof.* Note that  $\left\|\frac{w}{\sigma}\right\|^2$  has the Chi-squared distribution. A concentration bound by Laurent and  
 529 Massart [Laurent and Massart, 2000, Lemma 1] implies that for all  $t > 0$  we have

$$\Pr \left[ \left\| \frac{w}{\sigma} \right\|^2 - n \geq 2\sqrt{nt} + 2t \right] \leq e^{-t}.$$

530 Plugging-in  $t = \frac{n}{16}$ , we get

$$\Pr \left[ \left\| \frac{w}{\sigma} \right\|^2 \geq 2n \right] \leq \Pr \left[ \left\| \frac{w}{\sigma} \right\|^2 - n \geq n/2 + n/8 \right] \leq e^{-n/16}.$$

531 Thus, we have

$$\Pr \left[ \|w\| \geq \sigma\sqrt{2n} \right] \leq e^{-n/16}.$$

532

□

533 **Lemma C.2.** Let  $u \in \mathbb{R}^n$ , and  $v \sim \mathcal{N}(\mathbf{0}, \sigma^2 I_n)$ . Then, for every  $t > 0$  we have

$$\Pr [|\langle u, v \rangle| \geq \|u\| t] \leq 2 \exp \left( -\frac{t^2}{2\sigma^2} \right).$$

534 *Proof.* We

$$\begin{aligned}
N(x_0 + z) &= \sum_{i=1}^m u_i \sigma(\langle w_i, x_0 \rangle + \langle w_i, z \rangle) \\
&= \sum_{i \in I_-} u_i \sigma(\langle w_i, x_0 \rangle + \langle w_i, z \rangle) + \sum_{i \in I_+} u_i \sigma(\langle w_i, x_0 \rangle + \langle w_i, z \rangle) \\
&= \sum_{i \in I_-} u_i \sigma(\langle w_i, x_0 \rangle + \langle \bar{w}_i, \bar{z} \rangle) + \sum_{i \in I_+} u_i \sigma(\langle w_i, x_0 \rangle + \langle \bar{w}_i, \bar{z} \rangle) \tag{2}
\end{aligned}$$

where the last equality is since  $(z)_{1:d-\ell} = \mathbf{0}$ , hence  $\langle w, z \rangle = \langle \bar{w}, \bar{z} \rangle$  for every  $w \in \mathbb{R}^d$ . We will bound each term of the above separately.

For the first term in Eq. (2), where  $i \in I_-$  we can write:

$$\langle \bar{w}_i, \bar{z} \rangle = \alpha \|\bar{w}_i\|^2 + \alpha \langle \bar{w}_i, \sum_{j \neq i} \text{sign}(u_j) \bar{w}_j \rangle.$$

By our assumptions,  $\bar{w}_i \sim \mathcal{N}(\mathbf{0}, \frac{1}{d} I_\ell)$  and  $\sum_{j \neq i} \text{sign}(u_j) \bar{w}_j \sim \mathcal{N}(\mathbf{0}, \frac{m-1}{d} I_\ell)$ , since it is a sum of  $m-1$  i.i.d. Gaussian random variables, which are also symmetric hence multiplying them by  $-1$  does not change their distribution. From Lemma B.1 we get w.p.  $\geq 1 - e^{-\ell/16}$  that

$$\alpha \cdot \|\bar{w}_i\|^2 \geq \alpha \cdot \frac{\ell}{2d}.$$

From Lemma C.3, and using  $t = \sqrt{\frac{(m-1) \log(dm^2)}{d}}$  we get w.p.  $\geq 1 - e^{-\ell/16} + 2e^{-t^2 d/2(m-1)} = 1 - e^{-\ell/16} + 2$

565 Define  $F_- := \{i \in I_- : \langle w_i, x_0 \rangle \geq 0\}$ , and  $k_- = |F_-|$ . We have that:

$$\begin{aligned} \sum_{i \in I_-} u_i (\sigma(\langle w_i, x_0 \rangle + C) - \sigma(\langle w_i, x_0 \rangle)) &\leq \sum_{i \in F_-} u_i (\sigma(\langle w_i, x_0 \rangle + C) - \sigma(\langle w_i, x_0 \rangle)) \\ &= \sum_{i \in F_-} u_i C = -\frac{k_- C}{\sqrt{m}}, \end{aligned}$$

566 where the first inequality is since we only sum over negative terms, and the second inequality is since  
567 both  $\langle w_i, x_0 \rangle \geq 0$  (because  $i \in F_-$ ) and  $C \geq 0$  (because  $\ell \geq 32(m-1)\log(m^2d)$ ). Combining all  
568 of the above, we get that:

$$N(x_0 + z) \leq -\frac{k_- C}{\sqrt{m}} + N(x_0). \quad (4)$$

569 By our assumption that  $\ell \geq 32(m-1)\log(m^2d)$  we have that

$$\begin{aligned} C &= \alpha \left( \frac{1}{2} \frac{\ell}{d} - \sqrt{2} \sqrt{m-1} \frac{\sqrt{\ell}}{d} \sqrt{\log(dm^2)} \right) \\ &= \frac{\alpha \sqrt{\ell}}{d} \left( \frac{\sqrt{\ell}}{2} - \sqrt{2(m-1)\log(m^2d)} \right) \\ &\geq \frac{\alpha \ell}{4d}. \end{aligned}$$

570 Plugging in  $C$  and  $\alpha = \frac{8\sqrt{md}N(x_0)}{k_- \ell}$  to Eq. (4) we get that:

$$\begin{aligned} N(x_0 + z) &\leq -\frac{k_- C}{\sqrt{m}} + N(x_0) \\ &\leq -\frac{k_-}{\sqrt{m}} \cdot \frac{\ell}{4d} \cdot \frac{8\sqrt{md}N(x_0)}{k_- \ell} + N(x_0) = -N(x_0) < 0, \end{aligned}$$

571 and in particular  $\text{sign}(N(x_0)) \neq \text{sign}(N(x_0 + z))$ .

572 We are left with calculating the norm of  $z$ :

$$\begin{aligned} \|z\| &= \alpha \cdot \left\| \sum_{i \in I_-} \Pi_{M^\perp}(w_i) - \sum_{i \in I_+} \Pi_{M^\perp}(w_i) \right\| \\ &= \alpha \cdot \left\| \sum_{i=1}^m -\text{sign}(u_i) \Pi_{M^\perp}(w_i) \right\| \\ &= \alpha \cdot \left\| \sum_{i=1}^m -\text{sign}(u_i) \bar{w}_i \right\|. \end{aligned}$$

573 Since for each  $i \in [m]$ ,  $\bar{w}_i \sim \mathcal{N}(\mathbf{0}, \frac{1}{d} I_\ell)$ , then  $-\text{sign}(u_i) \bar{w}_i$  also have the same distribution, because  
574 this is a symmetric distribution. Hence,  $\sum_{i=1}^m -\text{sign}(u_i) \bar{w}_i \sim \mathcal{N}(\mathbf{0}, \frac{m}{d} I_\ell)$  as a sum of Gaussian  
575 random variables. Using Lemma C.1 we get w.p  $\geq 1 - e^{-\ell/16}$  that  $\|\sum_{i=1}^m -\text{sign}(u_i) \bar{w}_i\|^2 \leq \frac{2m\ell}{d}$ .  
576 Plugging in  $\alpha$  we get that:

$$\|z\| \leq \sqrt{\frac{2m\ell}{d}} \cdot \frac{8\sqrt{md}N(x_0)}{k_- \ell} = 8\sqrt{2}N(x_0) \cdot \frac{m}{k_-} \cdot \sqrt{\frac{d}{\ell}}.$$

577

□

## D Proofs for Section 6

For proving the main theorem, we will use the following lemma that upper bounds the norm of a sum of Gaussian random variables:

**Lemma D.1.** *Let  $w_1, \dots, w_m \in \mathbb{R}^n$  such that for all  $i \in [m]$ ,  $w_i \sim \mathcal{N}(\mathbf{0}, \sigma^2 I_n)$ , then we have:*

$$\mathbb{P} \left[ \left\| \sum_{i=1}^m w_i \right\|^2 \geq 2m\sigma^2 n \right] \leq e^{-\frac{n}{16}}$$

*Proof.* We denote the  $j$ -th coordinate of the vector  $w_i \in \mathbb{R}^n$  by  $w_{i,j}$ . Note, for any  $i \in [m]$  and  $j \in [n]$  we have  $w_{i,j} \sim \mathcal{N}(0, \sigma^2)$ . We denote by  $s$  the sum vector  $s := \sum_{i=1}^m w_i$ , and by  $s_j$  the  $j$ -th coordinate of  $s$ . By this definition,  $s_j = \sum_{i=1}^m w_{i,j}$  is a sum of  $m$  independent Gaussian variables and therefore also a Gaussian variable. Therefore,  $s \sim \mathcal{N}(\mathbf{0}, m\sigma^2 I_n)$ . We use Lemma C.1 with variance  $m\sigma^2$  and get that:

$$\mathbb{P} \left[ \left\| \sum_{i=1}^m w_i \right\|^2 \geq 2m\sigma^2 n \right] \leq e^{-\frac{n}{16}}.$$

□

We now prove the main theorem of this section:

*Proof of Theorem 6.1.* Similar to the lower bound of the norm, let  $M = \text{span}\{e_1, \dots, e_{d-\ell}\}$ . By Theorem A.1(1), given a training dataset  $X \subseteq P$ , it is enough to consider a training set  $X_R = \{Rx : x \in X\}$ , where  $R$  is an orthogonal matrix such that  $R \cdot P = M$ , and training is done over  $X_R$ . From now on, we assume that the training data, as well as  $x_0$  lie on  $M$ , and the consequences of this proof would also imply for a dataset  $X$  and  $x_0 \in P$ .

The projection of the gradient on  $M^\perp$  is equal to:

$$\Pi_{M^\perp} \left( \frac{\partial N(x_0)}{\partial x} \right) = \Pi_{M^\perp} \left( \sum_{i=1}^m u_i w_i \mathbb{1}_{\langle w_i, x_0 \rangle \geq 0} \right) = \sum_{i=1}^m \Pi_{M^\perp} (u_i w_i) \mathbb{1}_{i \in S} = \sum_{i \in S} \Pi_{M^\perp} (u_i w_i).$$

Denote by  $\hat{w}_i = (w_i)_{d-\ell+1:d}$ , the last  $\ell$  coordinates of  $w_i$ . By Theorem A.2 we get that for every  $i \in [m]$ ,  $\hat{w}_i$  did not change from their initial value during training.

Recall that we initialized  $\hat{w}_i \sim \mathcal{N}(\mathbf{0}, \beta^2 I_\ell)$ . Note that the set  $S$  is independent of the value of the  $\hat{w}_i$ 's. This is because  $\hat{w}_i$  does not effect the training, hence will not effect  $w_i - \Pi_{M^\perp}(w_i)$ . Also, after choosing  $x_0$  we have  $\langle \hat{w}_i, \hat{x}_0 \rangle = 0$ , since  $\hat{x}_0 = \mathbf{0}$ , which means that the choice of  $S$  is independent of the  $\hat{w}_i$ 's. We can conclude that the random variables  $\hat{w}_i$  for  $i \in S$  are sampled independently.

Therefore, from Lemma B.2 we get that w.p.  $\geq 1 - e^{-\ell/16}$ :

$$\left\| \sum_{i \in S} \hat{w}_i \right\| \leq \beta \sqrt{2k\ell}.$$

Note, since for all  $i \in [m]$ ,  $|u_i| = \frac{1}{\sqrt{m}}$  and they are not trained, we get w.p.  $\geq 1 - e^{-\ell/16}$  that:

$$\left\| \Pi_{M^\perp} \left( \frac{\partial N(x_0)}{\partial x} \right) \right\| \leq \beta \sqrt{\frac{2k\ell}{m}}.$$

□

## 604 D.1 Explicit $L_2$ regularization

605 *Proof of Theorem 6.2.* As before, for this proof we rotate the data subspace  $P$  to lie on  $M =$   
 606  $\text{span}\{e_1, \dots, e_{d-\ell}\}$  and rotate the model's weights accordingly. For a dataset  $(x_1, y_1), \dots, (x_r, y_r)$ ,  
 607 we train over the following objective:

$$\sum_{j=1}^r L(y_j \cdot N(x_j, \mathbf{w}_{1:m})) + \frac{1}{2} \lambda \|\mathbf{w}_{1:m}\|^2$$

608 In Theorem A.2, we showed for all  $(x_j, y_j)$  that if we train the model using the loss  $L$  we get:

$$\Pi_{M^\perp} \left( \frac{\partial L(N(x_j, \mathbf{w}_{1:m}) \cdot y_j)}{\partial w_i} \right) = 0$$

609 Now, we analyze the training process using the new loss which includes the regularization term. We  
 610 denote by  $w_i^{(t)}$  the weight vector  $w_i$  after  $t$  training steps, and by  $\hat{w}_i^{(t)} := \Pi_{M^\perp} \left( w_i^{(t)} \right)$  its projection  
 611 on the subspace orthogonal to  $M$ . We look at the projected gradient of  $w_i^{(t)}$  w.r.t. the loss:

$$\begin{aligned} & \Pi_{M^\perp} \left( \frac{\partial \sum_{j=1}^r L(N(x_j, \mathbf{w}_{1:m}^{(t)}) \cdot y_j)}{\partial w_i} + \frac{\partial \frac{1}{2} \lambda \|w_i^{(t)}\|^2}{\partial w_i} \right) = \\ & = \sum_{j=1}^r \Pi_{M^\perp} \left( \frac{\partial L(N(x_j, \mathbf{w}_{1:m}^{(t)}) \cdot y_j)}{\partial w_i} \right) + \Pi_{M^\perp} \left( \frac{\partial \frac{1}{2} \lambda \|w_i^{(t)}\|^2}{\partial w_i} \right) \\ & = \Pi_{M^\perp} \left( \frac{\partial \frac{1}{2} \lambda \|w_i^{(t)}\|^2}{\partial w_i} \right) \\ & = \Pi_{M^\perp} \left( \lambda w_i^{(t)} \right) \\ & = \lambda \hat{w}_i^{(t)}. \end{aligned}$$

612 For a training step of size  $\eta$ , using gradient descent we get that:

$$\hat{w}_i^{(t+1)} = \hat{w}_i^{(t)} - \eta \lambda \hat{w}_i^{(t)}.$$

613 Thus, after a total of  $T$  iteration of training we get that:

$$\hat{w}_i^{(T)} = (1 - \eta \lambda)^T \hat{w}_i^{(0)}.$$

614 Therefore, the projection of gradients after training onto  $P^\perp$  will be the same as if they were initialized  
 615 to  $\sim \mathcal{N}\left(0, \frac{(1-\eta\lambda)^{2T}}{d} I_d\right)$  and trained using logistic loss without regularization. The rest of the proof  
 616 is the same as Theorem 6.1 for  $\beta = \frac{(1-\eta\lambda)^T}{\sqrt{d}}$ .  $\square$

## 617 E Further Experiments and Experimental Details

### 618 E.1 Further Experiments

619 In Figure 3 we present the boundary of a two-layer ReLU network trained over a 25-point dataset  
 620 on a two-dimensional linear subspace, similar to Figure 2. We train the networks until reaching a  
 621 constant positive margin. The difference between the figures is that in Figure 3 we initialize the  
 622 weights using the default PyTorch initialization, while in Figure 2 we initialized using a smaller scale

for the robustness effect to be smaller, and visualized more easily. The experiment in Figure 3 is demonstrating an extreme robustness effect, occurring when using the standard settings.

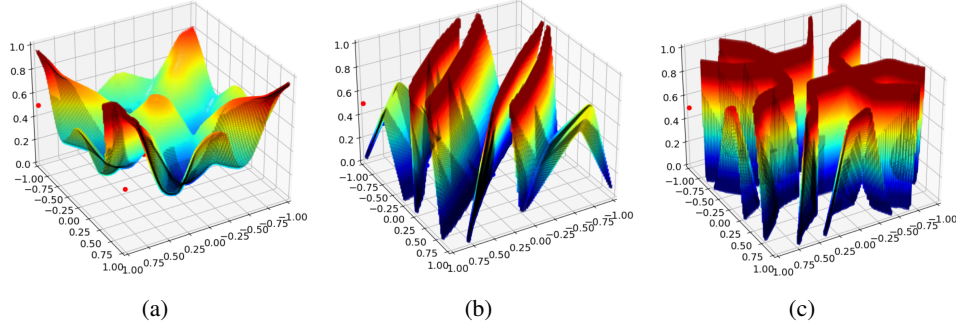

Figure 3: **Experiments on two-dimensional dataset.** We plot the dataset points and the decision boundary in 3 settings: (a) Vanilla trained network, (b) The network’s weights are initialized from a smaller variance distribution, and (c) Training with regularization. Colors are used to emphasise the values in the  $z$  axis.

In Figure 4 we go beyond the theory discussed in this paper, and present similar phenomena in all three settings for a five-layer ReLU network. In Figure 4a we can see the boundary of the regularly trained network within a small distance in  $P^\perp$  from the data points. In Figure 4b we use small initialization for all five layers, and present a boundary almost orthogonal to the data manifold. In Figure 4c, the boundary of a regularized trained network is in a similar form. This experiment suggests that our theoretical results might be extended also to deeper networks, where all layers are trained.

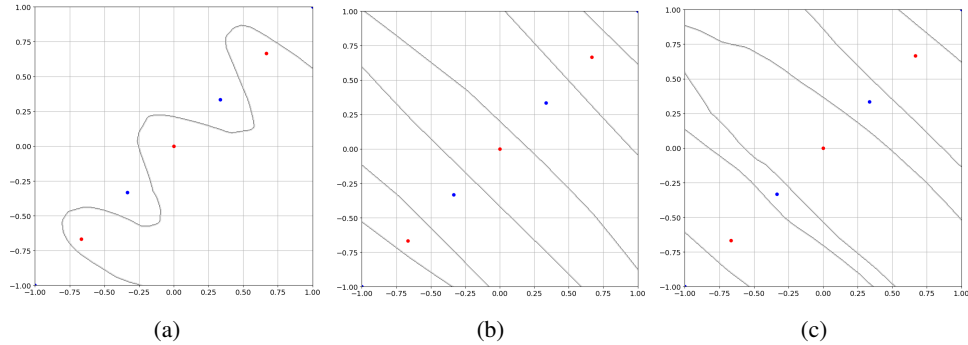

Figure 4: **Experiments on one-dimensional dataset with deep network.** We plot the dataset points and the decision boundary in 3 settings: (a) Vanilla trained network, (b) The network’s weights are initialized from a smaller variance distribution, and (c) Training with regularization.

## E.2 One-dimensional dataset experiment - 2 layer network (Figure 1)

**Dataset** For all the three experiments we used a 7-point data set, spread equally on the two dimensional line  $y = x$  from  $(-1, -1)$  to  $(1, 1)$ .

**Network** For all the three experiments we used two-layer ReLU network of width 100 with biases in both layers. The weights of both layers were initialized using (1+3) default PyTorch initialization for linear layers, (2) default initialization divided by 3.

**Training** We used train step of size 0.02 for (1+3) and 0.04 for (2). We trained both layers until the margin reached 0.3. The losses we used were (1+2) Logistic loss, (3) Logistic loss with 0.005  $L_2$  regularization.

### 641 E.3 Two-dimensional dataset experiment - smaller effect (Figure 2)

642 **Dataset** For all the three experiments we used a 25-point data set, spread equally on a grid which  
643 lies on the  $z = 0.5$  axis.

644 **Network** For all the three experiments we used two-layer ReLU network of width 4000 with biases  
645 in both layers. The weights in the first layer were initialized in (1+3) from  $\mathcal{N}(\mathbf{0}, 1/3I_3)$ , and in (2)  
646 from  $\mathcal{N}(\mathbf{0}, 1/36I_3)$ . The weight of the output layer were initialized to the uniform distribution over  
647 the set  $\{-1, 1\}$ .

648 **Training** For all the experiments we trained both layers until the margin reached 0.3 and we used  
649 train step of size 0.002. The losses we used were (1+2) Logistic loss, (3) Logistic loss with 0.8  $L_2$   
650 regularization on the weights of the first layer.

### 651 E.4 Two-dimensional dataset experiment (Figure 3)

652 **Dataset** For all the three experiments we used a 25-point data set, spread equally on a grid which  
653 lies on the  $x - y$  axis.

654 **Network** For all the three experiments we used two-layer ReLU network of width 400 with biases  
655 in both layers. The weights in any layer were initialized using (1+3) default PyTorch initialization for  
656 linear layers, (2) default initialization divided by 3.

657 **Training** For (1) experiments we used train step of size 0.005, and for (2+3) we used step of size  
658 0.05. We trained both layers until the margin reached 0.1. The losses we used were (1+2) Logistic  
659 loss, (3) Logistic loss with 0.005  $L_2$  regularization.

### 660 E.5 One-dimensional dataset experiment - 5 layer network (Figure 4)

661 **Dataset** For all the three experiments we used a 7-point data set, spread equally on the two  
662 dimensional line  $y = x$  from  $(-1, -1)$  to  $(1, 1)$ .

663 **Network** For all the three experiments we used 5-layer ReLU network of width 100 with biases in  
664 all layers. The weights in any layer were initialized using (1+3) default PyTorch initialization for  
665 linear layers, (2) default initialization divided by 3.

666 **Training** For (1+3) experiments we used train step of size 0.02, and for (2) we used step of size  
667 0.06. we trained all layers until the margin reached 0.3. The losses we used were (1+2) Logistic loss,  
668 (3) Logistic loss with 0.01  $L_2$  regularization.
